# Supplementary material
Source: Springer Nature journal article supplement (https://www.springermedizin.de/resource/supplementary/13046_2008_105_MOESM5_ESM.pdf/9661636)

**Figure 2b: Immunological reactivity of patient B:  
Interferon- $\gamma$  secreting T-lymphocytes in PBMC**

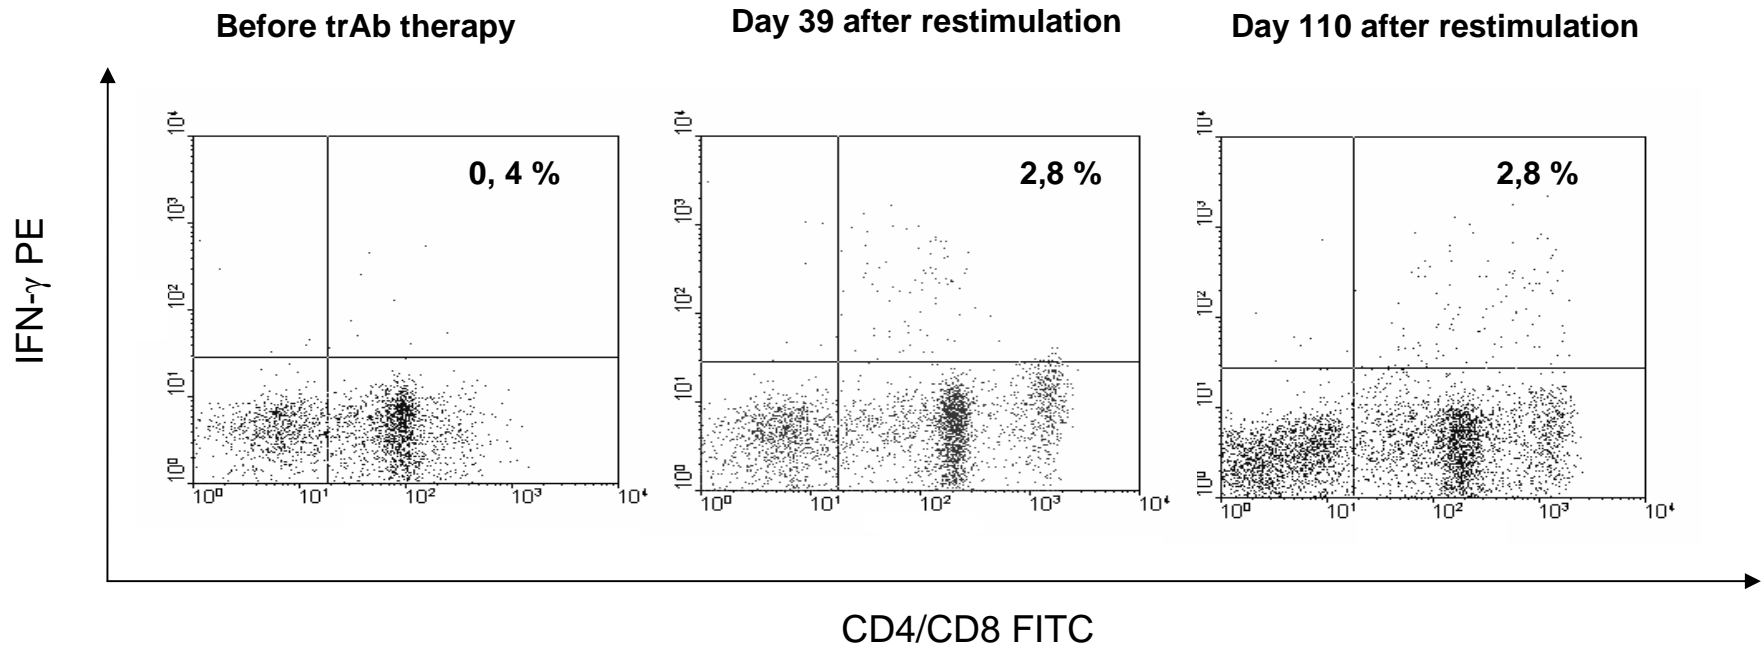

Supplement: MOESM5 [file 9661636]
